# Supplementary material
Source: publisher figshare collection journal article supplement (https://sage.figshare.com/ndownloader/files/18725219)
Supplement: Supplementary file 1 [file 18725219]

## Sheet: BP
ID	Description	GeneRatio	BgRatio	pvalue	p.adjust	qvalue	geneID	Count
GO:0001819	positive regulation of cytokine production	108/2628	425/23239	2.35425e-16	5.23602e-14	3.24271e-14	Il1a/Cadm1/Cx3cl1/Htr2b/Prg2/Il12b/Ptgs2/Wnt11/Il10/Cd83/Osm/Cyp2j6/Prg3/Serpine1/Scamp5/Thbs1/Cebpb/C3ar1/Egr1/Mmp12/Tnfsf4/Elane/Cd34/Nr4a3/Ccl2/Tigit/Ccr7/Adam8/Cd14/Il1b/Il1rl1/Ffar2/Tnfsf9/Ccl4/Clec9a/Cd200/Ccl3/Hilpda/Il1rn/Card11/Cd276/Ulbp1/Il6/Ccr5/Mcoln2/Il12rb1/C5ar1/Ptafr/Tlr3/Havcr2/Ifng/Cd209d/Il18r1/Rgcc/Il1rl2/Rab7b/P2ry2/Clec4n/Jak2/Cd274/Cd6/Tmf1/Fzd5/Gata3/Akirin2/Cd36/Slamf6/C…	108
GO:1901342	regulation of vasculature development	86/2628	332/23239	8.35339e-14	9.28928e-12	5.75293e-12	Enpp2/Il1a/Sparc/Ecscr/Epha2/Cx3cl1/Adamts1/Tmem100/Thbs2/Ptprm/Sphk1/Ptgs2/Ptn/Il10/Dll4/F3/Stab1/Asb4/Stard13/Kdr/Kit/Serpine1/Thbs1/Angpt2/Fgf1/C3ar1/Egr1/Tgfb2/Camp/Spry2/Adgrb2/Cd34/Chil1/Ccl2/Lif/Il1b/Vegfb/Ccl24/Ppp1r16b/Epn2/Plk2/Pde3b/Serpinf1/C5ar1/Pdgfb/Notch4/Tlr3/Ifng/Rgcc/Col4a2/Tnfrsf12a/Spred1/Ets1/Cd36/Gab1/Cma1/Fasl/Creb3l1/Cxcr4/Ptger4/Hif1a/Jup/Cxcl10/Plcg1/Pparg/Ccl5/Prkcb/Ma…	86
GO:0045765	regulation of angiogenesis	78/2628	300/23239	9.67516e-13	8.42019e-11	5.2147e-11	Enpp2/Il1a/Sparc/Ecscr/Epha2/Cx3cl1/Adamts1/Thbs2/Ptprm/Sphk1/Ptgs2/Ptn/Il10/Dll4/F3/Stab1/Stard13/Kdr/Serpine1/Thbs1/Angpt2/Fgf1/C3ar1/Tgfb2/Camp/Spry2/Adgrb2/Cd34/Chil1/Ccl2/Lif/Il1b/Vegfb/Ccl24/Ppp1r16b/Epn2/Plk2/Pde3b/Serpinf1/C5ar1/Notch4/Tlr3/Rgcc/Col4a2/Tnfrsf12a/Spred1/Ets1/Cd36/Gab1/Cma1/Fasl/Creb3l1/Cxcr4/Hif1a/Jup/Cxcl10/Plcg1/Pparg/Ccl5/Prkcb/Map3k3/Rock2/Btg1/Sp1/S100a1/Id1/Ago1/E2f2…	78
GO:0007265	Ras protein signal transduction	94/2628	400/23239	2.91594e-12	2.36625e-10	1.46544e-10	Pdpn/Ednra/Rab4a/Arhgef25/Lpar1/Rab34/Kank1/Celsr1/Rab15/Iqgap3/Kitl/Arfgef3/Rhov/Igf1/Rasgrp3/Arhgef40/Lpar4/Tgfb2/Spry2/Rhobtb1/Ctnnal1/Plekhg5/P2ry10/Net1/Spry1/Rnd2/Stmn1/Ect2/Rab20/Abca1/Gna12/Plk2/Prag1/Timp2/Arhgef39/Arf6/Ssx2ip/Rhoc/Rab7b/Foxm1/Rac3/Rac1/Rabgef1/Csf1/Vav2/Apoe/Jun/Rab12/Rap2a/Dok2/Adgrg1/Rras2/Ophn1/Hras/Kras/Rasa2/Ralgps1/Rasal3/Rab6b/Rasgrp1/Lat/Dnajc27/Arhgef10/Vav3/Rh…	94
GO:0048659	smooth muscle cell proliferation	50/2628	167/23239	5.32669e-11	3.33195e-09	2.06351e-09	Cx3cl1/Adamts1/Il12b/Cav1/Ednra/Ptgs2/Il10/Igf1/Thbs1/Tgm2/C3ar1/Egr1/Elane/Nr4a3/Xrcc5/Hbegf/Bmpr1a/Apod/Tnfaip3/Tgfb3/Mmp2/Myc/Cdkn1a/Il6/Pdgfb/Ndrg2/Ptafr/Ifng/Jak2/S1pr1/Akt1/Jun/Tcf7l2/Ptk2/Trib1/Gsk3b/Hif1a/Mef2d/Pparg/Ccl5/Mdm2/Hdac4/Aif1/Gnaq/Tnf/Calcrl/Ptgir/Itgb3/Adipoq/Alox12	50
GO:0048660	regulation of smooth muscle cell proliferation	49/2628	162/23239	5.53767e-11	3.42822e-09	2.12312e-09	Cx3cl1/Adamts1/Il12b/Cav1/Ptgs2/Il10/Igf1/Thbs1/Tgm2/C3ar1/Egr1/Elane/Nr4a3/Xrcc5/Hbegf/Bmpr1a/Apod/Tnfaip3/Tgfb3/Mmp2/Myc/Cdkn1a/Il6/Pdgfb/Ndrg2/Ptafr/Ifng/Jak2/S1pr1/Akt1/Jun/Tcf7l2/Ptk2/Trib1/Gsk3b/Hif1a/Mef2d/Pparg/Ccl5/Mdm2/Hdac4/Aif1/Gnaq/Tnf/Calcrl/Ptgir/Itgb3/Adipoq/Alox12	49
GO:0050663	cytokine secretion	59/2628	222/23239	2.16795e-10	1.16237e-08	7.19867e-09	Gas6/Il1a/Cadm1/Cx3cl1/Htr2b/Il10/Osm/Cyp2j6/Fbln1/Scamp5/Mmp12/Tnfsf4/Cd34/Chil1/Il1r2/Ccr7/Trem1/Cd14/Il1b/Il1rl1/Ffar2/Clec9a/Tnfrsf4/Tnfaip3/Ccl3/Abca1/Card11/Cd276/Il6/Ccr5/Mcoln2/Havcr2/Ifng/Cd209d/Rgcc/Clec4n/Cd274/C5ar2/Fzd5/Rabgef1/Gata3/Ffar4/Cd36/Arg2/Tlr2/Ptger4/Tnfrsf9/Rasgrp1/Tlr5/Il4ra/Clec4e/Tnf/Flt3/Tnfrsf14/Casp4/Fn1/Mmp8/Zbtb7b/Slamf1	59
GO:0050707	regulation of cytokine secretion	53/2628	195/23239	7.3715e-10	3.4855e-08	2.1586e-08	Gas6/Il1a/Cadm1/Cx3cl1/Htr2b/Il10/Osm/Cyp2j6/Fbln1/Scamp5/Mmp12/Tnfsf4/Cd34/Il1r2/Ccr7/Cd14/Il1b/Il1rl1/Ffar2/Clec9a/Tnfrsf4/Tnfaip3/Ccl3/Cd276/Il6/Ccr5/Havcr2/Ifng/Cd209d/Rgcc/Clec4n/Cd274/C5ar2/Fzd5/Rabgef1/Gata3/Ffar4/Cd36/Arg2/Tlr2/Ptger4/Tnfrsf9/Rasgrp1/Tlr5/Il4ra/Clec4e/Tnf/Flt3/Tnfrsf14/Casp4/Fn1/Mmp8/Slamf1	53
GO:0045862	positive regulation of proteolysis	73/2628	316/23239	1.72577e-09	7.34276e-08	4.54743e-08	Dab2/Cyr61/Ecscr/Mmp14/F3/Plk3/Uaca/Ctgf/Pawr/Wdr35/Plk1/Prickle1/Rnf180/Khdc1b/Adam8/Il1b/S100a9/Plk2/Fyn/Myc/Gclc/Hspa1a/Ifng/Ppp2ca/Jak2/S100a8/Lgmn/Smurf1/Mtch1/Pmaip1/Akt1/Aurka/Apoe/Spon1/Bbs7/Smad7/Akirin2/Hip1r/Lck/Ptk2/Trib1/Fasl/Capn3/Gsk3b/Zfand2a/Csnk1e/Tbc1d10a/Gramd4/Pparg/Dapk1/Axin1/Adam9/Mdm2/Arih2/Rock2/Tnf/Rnf139/Fis1/Ifi27l2a/Rack1/Cln6/Casp4/Rps3/Bag6/Arl6ip5/Rnf144a/Ctnnd1/C…	73
GO:0048771	tissue remodeling	50/2628	187/23239	4.03071e-09	1.46693e-07	9.08484e-08	Il1a/Timp1/Spp1/Ctsk/Epha2/Cspg4/Gpnmb/Cav1/Gja1/Mmp14/Dll4/Mertk/Igf1/Dcstamp/Tgm2/Angpt2/Tgfb2/Adam8/P3h4/Lif/Jag1/Enpp1/Chd7/Mmp2/Vdr/Ltbp3/Tfrc/Il6/Tmem64/Rac1/S1pr1/Axl/Cd38/Acp5/Tnfrsf11a/Ptger4/Hif1a/B4galt1/Inpp4b/Suco/Mdm2/Tmbim1/Rock2/Itga4/Capn1/Bmpr2/Bak1/Itgb3/Car2/Il23a	50
GO:0034329	cell junction assembly	52/2628	200/23239	5.6751e-09	1.94737e-07	1.20602e-07	Enpp2/Epha2/Pmp22/Cldn1/Phldb2/Cav1/Ptprk/Wnt11/Gja1/Mmp14/Snai1/Cdh17/Kdr/Fscn1/Actn2/Sdc4/Epb41l3/Ctnnd2/Nphp1/Dapk3/Tns1/Apod/Cdh1/Ect2/Rhoc/Prkaca/Rac1/Fzd5/Dst/Cttn/Smad7/Ldb1/Ophn1/Ptk2/Jup/Heg1/Whamm/Dusp3/Rcc2/Slk/Rock2/Bcl2/Rapgef2/Tnf/Cd9/Dusp22/Hipk1/Ptpro/Tesk2/Ctnnd1/Fn1/Itgb3	52
GO:0048661	positive regulation of smooth muscle cell proliferation	34/2628	105/23239	6.80415e-09	2.2574e-07	1.39803e-07	Cx3cl1/Adamts1/Ptgs2/Igf1/Thbs1/Tgm2/C3ar1/Egr1/Elane/Nr4a3/Hbegf/Bmpr1a/Mmp2/Myc/Il6/Pdgfb/Ptafr/Jak2/S1pr1/Akt1/Jun/Ptk2/Gsk3b/Hif1a/Mef2d/Ccl5/Mdm2/Hdac4/Aif1/Gnaq/Tnf/Calcrl/Itgb3/Alox12	34
GO:0043277	apoptotic cell clearance	18/2628	36/23239	1.04479e-08	3.234e-07	2.00285e-07	Gas6/Mertk/Thbs1/Tgm2/Ccl2/Rhobtb1/Rac3/Rac1/Axl/Cd300lf/Pear1/Cd36/Nr1h3/Jmjd6/Abca7/Rara/C3/Itgb3	18
GO:0034330	cell junction organization	59/2628	248/23239	1.97842e-08	5.57766e-07	3.45429e-07	Enpp2/Epha2/Pmp22/Cldn1/Phldb2/Cav1/Ptprk/Wnt11/Gja1/Mmp14/Snai1/Cdh17/Kdr/Fscn1/Actn2/Sdc4/Epb41l3/Ctnnd2/Tgfb2/Cxadr/Nphp1/Dapk3/Tns1/Apod/Cdh1/Tgfb3/Ect2/Whrn/Arf6/Rhoc/Prkaca/Rac1/Grhl1/Fzd5/Dst/Cttn/Smad7/Ldb1/Ophn1/Ptk2/Jup/Heg1/Whamm/Dusp3/Rcc2/Slk/Rock2/Bcl2/Rapgef2/Tnf/Cd9/Dusp22/Hipk1/Ptpro/Tesk2/Ctnnd1/Fn1/Cd177/Itgb3	59
GO:0071559	response to transforming growth factor beta	51/2628	205/23239	3.81419e-08	9.95836e-07	6.1673e-07	Dab2/Pmepa1/Cd109/Nrep/Folr1/Npnt/Cav1/Ptprk/Htra3/Dbn1/Rasl11b/Sox9/Yes1/Eid2/Serpine1/Thbs1/Tgfb2/Itgb5/Ccl2/Cdkn2b/Got1/Bmpr1a/Skil/Bambi/Tgfb3/Ltbp3/Fyn/Htra1/Chst11/Smad6/Col4a2/Smurf1/Jun/Smad7/Ldlrad4/Map3k7/Ptk2/Zfp36l1/Fos/Hspa5/Twsg1/Runx3/Axin1/Adam9/Zeb1/Cited2/Rock2/Map3k1/Dusp22/Bmpr2/Acvr1b	51
GO:1904018	positive regulation of vasculature development	49/2628	198/23239	8.33975e-08	1.91878e-06	1.18832e-06	Il1a/Cx3cl1/Tmem100/Sphk1/Ptgs2/Il10/F3/Asb4/Kdr/Kit/Serpine1/Thbs1/Angpt2/Fgf1/C3ar1/Egr1/Camp/Cd34/Chil1/Il1b/Vegfb/Ccl24/Ppp1r16b/Plk2/C5ar1/Pdgfb/Notch4/Tlr3/Ets1/Gab1/Cma1/Cxcr4/Hif1a/Jup/Plcg1/Ccl5/Prkcb/Map3k3/Rapgef2/Btg1/Sp1/S100a1/Cybb/C3/Rras/Itgb3/Rhoj/Epha1/Hmga2	49
GO:0071560	cellular response to transforming growth factor beta stimulus	49/2628	200/23239	1.16481e-07	2.59062e-06	1.60439e-06	Dab2/Pmepa1/Cd109/Nrep/Folr1/Npnt/Cav1/Ptprk/Htra3/Dbn1/Rasl11b/Sox9/Yes1/Eid2/Serpine1/Thbs1/Tgfb2/Itgb5/Ccl2/Cdkn2b/Got1/Bmpr1a/Skil/Bambi/Tgfb3/Ltbp3/Fyn/Htra1/Chst11/Smad6/Col4a2/Smurf1/Jun/Smad7/Ldlrad4/Map3k7/Ptk2/Zfp36l1/Fos/Hspa5/Twsg1/Axin1/Adam9/Zeb1/Cited2/Map3k1/Dusp22/Bmpr2/Acvr1b	49
GO:0007179	transforming growth factor beta receptor signaling pathway	42/2628	161/23239	1.44661e-07	3.1704e-06	1.96346e-06	Dab2/Pmepa1/Cd109/Nrep/Folr1/Npnt/Cav1/Ptprk/Htra3/Rasl11b/Eid2/Thbs1/Tgfb2/Itgb5/Ccl2/Cdkn2b/Got1/Bmpr1a/Skil/Bambi/Tgfb3/Ltbp3/Htra1/Chst11/Smad6/Smurf1/Jun/Smad7/Ldlrad4/Map3k7/Ptk2/Fos/Hspa5/Twsg1/Axin1/Adam9/Zeb1/Cited2/Map3k1/Dusp22/Bmpr2/Acvr1b	42
GO:0032963	collagen metabolic process	30/2628	97/23239	1.62995e-07	3.50819e-06	2.17265e-06	Ctsk/P3h2/Mrc2/Arg1/Mmp14/Ctgf/Cyp2j6/Mmp11/Mmp7/Serpine1/Ccl2/Plod2/P3h3/P3h4/Got1/Tgfb3/Mmp2/Il6/Errfi1/Pdgfb/Rgcc/Creb3l1/Hif1a/Pparg/Ctsb/Mmp19/Suco/Id1/Cbx8/Mmp8	30
GO:0007266	Rho protein signal transduction	47/2628	191/23239	1.82067e-07	3.8497e-06	2.38415e-06	Pdpn/Ednra/Arhgef25/Lpar1/Kank1/Celsr1/Rhov/Arhgef40/Lpar4/Rhobtb1/Ctnnal1/Plekhg5/P2ry10/Net1/Rnd2/Stmn1/Ect2/Abca1/Gna12/Prag1/Arhgef39/Rhoc/Rac3/Rac1/Vav2/Apoe/Adgrg1/Ophn1/Arhgef10/Vav3/Rhoh/Baiap2/Rock2/Dnmbp/Pecam1/Cdc42ep3/Arhgef37/Bcl6/Tiam1/Gpr18/P2ry10b/Arhgef18/Rnd3/Cdc42ep2/Trio/Rhoj/Cdc42ep5	47
GO:0016055	Wnt signaling pathway	83/2628	418/23239	2.09304e-07	4.3416e-06	2.68879e-06	Dab2/Sall1/Cpe/Folr1/Cav1/Wnt11/Sostdc1/Dkk3/Kank1/Mertk/Celsr1/Dact3/Sox9/Amotl1/Dact1/Hic1/Sox4/Ctnnd2/Ankrd6/Egr1/Prickle1/Ccnd1/Ryk/Dapk3/Znrf3/Reck/Cdh1/Tnfaip3/Sdc1/Rnf43/Bambi/Tmem88/Gpc3/Otulin/Myc/Tmem64/Ndrg2/Lrp4/Csnk1g2/Ccne1/Rac1/Fzd5/Depdc1b/Axl/Gata3/Apoe/Tcf7l2/Ldb1/Siah2/Tcf7/Lef1/Rnf220/Csnk1g3/Tlr2/Gsk3b/Csnk1e/Tle1/Fzd7/Tle4/Ddit3/Axin1/Tnks2/Cdk14/Trpm4/Foxo1/Gnaq/Dvl3/Csnk2a…	83
GO:0050715	positive regulation of cytokine secretion	38/2628	141/23239	2.26604e-07	4.5663e-06	2.82795e-06	Il1a/Cadm1/Htr2b/Il10/Osm/Cyp2j6/Scamp5/Mmp12/Cd34/Ccr7/Cd14/Il1b/Il1rl1/Ffar2/Clec9a/Ccl3/Cd276/Ccr5/Havcr2/Ifng/Cd209d/Rgcc/Clec4n/Cd274/Fzd5/Gata3/Cd36/Tlr2/Ptger4/Rasgrp1/Il4ra/Clec4e/Tnf/Flt3/Tnfrsf14/Casp4/Mmp8/Slamf1	38
GO:0060828	regulation of canonical Wnt signaling pathway	51/2628	216/23239	2.26388e-07	4.5663e-06	2.82795e-06	Dab2/Folr1/Cav1/Wnt11/Sostdc1/Dkk3/Kank1/Dact3/Sox9/Dact1/Sox4/Ctnnd2/Ankrd6/Egr1/Prickle1/Dapk3/Znrf3/Reck/Cdh1/Bambi/Tmem88/Gpc3/Otulin/Tmem64/Lrp4/Csnk1g2/Apoe/Tcf7l2/Siah2/Rnf220/Csnk1g3/Gsk3b/Csnk1e/Tle1/Fzd7/Tle4/Ddit3/Axin1/Tnks2/Cdk14/Trpm4/Foxo1/Gnaq/Ptpro/Xiap/Rspo1/Pfdn5/Ctnnd1/Thra/Yap1/Draxin	51
GO:0198738	cell-cell signaling by wnt	83/2628	420/23239	2.58273e-07	5.11859e-06	3.16998e-06	Dab2/Sall1/Cpe/Folr1/Cav1/Wnt11/Sostdc1/Dkk3/Kank1/Mertk/Celsr1/Dact3/Sox9/Amotl1/Dact1/Hic1/Sox4/Ctnnd2/Ankrd6/Egr1/Prickle1/Ccnd1/Ryk/Dapk3/Znrf3/Reck/Cdh1/Tnfaip3/Sdc1/Rnf43/Bambi/Tmem88/Gpc3/Otulin/Myc/Tmem64/Ndrg2/Lrp4/Csnk1g2/Ccne1/Rac1/Fzd5/Depdc1b/Axl/Gata3/Apoe/Tcf7l2/Ldb1/Siah2/Tcf7/Lef1/Rnf220/Csnk1g3/Tlr2/Gsk3b/Csnk1e/Tle1/Fzd7/Tle4/Ddit3/Axin1/Tnks2/Cdk14/Trpm4/Foxo1/Gnaq/Dvl3/Csnk2a…	83
GO:0003158	endothelium development	33/2628	116/23239	3.58815e-07	6.71241e-06	4.15705e-06	Tmem100/Pdpn/Cldn1/Dll4/Stard13/Kdr/Col18a1/Nr2f2/Fgf1/Tjp1/Slc40a1/Il1b/Jag1/Ppp1r16b/Pdgfb/Notch4/Kdm6b/Clic4/Cxcr4/F11r/Ptprs/Cxcl10/Heg1/Zeb1/Rock2/Rapgef2/Btg1/Tnf/Pecam1/Id1/Bmpr2/Gpx1/Alox12	33
GO:0097746	regulation of blood vessel diameter	40/2628	156/23239	4.63148e-07	8.27739e-06	5.12626e-06	Htr7/Cx3cl1/Htr2b/Ptprm/Cav1/Ednra/Ptgs2/Gja1/Atp1a2/Kdr/Kcnma1/Wdr35/Hrh1/Adcy6/Mmp2/Per2/Mgll/Dusp5/Pdgfb/Ptafr/P2ry2/Ednrb/Smad6/Ptgs1/Cd38/Akt1/Apoe/Ptk2/Hrh2/Hif1a/Trpm4/Snta1/P2ry1/Add3/Itga1/Acta2/Bmpr2/Gpx1/Slc6a4/Alox12	40
GO:0014909	smooth muscle cell migration	28/2628	91/23239	4.6886e-07	8.35461e-06	5.17408e-06	Adamts1/Parva/Lpar1/F3/Serpine1/Igf1/Egr1/Sema6d/Nr4a3/Plxna1/Bmpr1a/Myc/Pdgfa/Pdgfb/Plau/P2ry2/Ptk2/Trib1/Ptger4/Ddr1/Ccl5/Mdm2/Hdac4/Apex1/Aif1/Bcl2/Itgb3/Adipoq	28
GO:0030111	regulation of Wnt signaling pathway	61/2628	283/23239	4.87455e-07	8.60931e-06	5.33182e-06	Dab2/Sall1/Folr1/Cav1/Wnt11/Sostdc1/Dkk3/Kank1/Dact3/Sox9/Dact1/Hic1/Sox4/Ctnnd2/Ankrd6/Egr1/Prickle1/Dapk3/Znrf3/Reck/Cdh1/Tnfaip3/Rnf43/Bambi/Tmem88/Gpc3/Otulin/Tmem64/Lrp4/Csnk1g2/Depdc1b/Apoe/Tcf7l2/Siah2/Lef1/Rnf220/Csnk1g3/Tlr2/Gsk3b/Csnk1e/Tle1/Fzd7/Tle4/Ddit3/Axin1/Tnks2/Cdk14/Trpm4/Foxo1/Gnaq/Rnf213/Tiam1/Ptpro/Xiap/Rspo1/Pfdn5/Ctnnd1/Thra/Yap1/Hmga2/Draxin	61
GO:0014910	regulation of smooth muscle cell migration	26/2628	84/23239	1.04877e-06	1.70213e-05	1.05414e-05	Adamts1/Lpar1/F3/Serpine1/Igf1/Egr1/Sema6d/Nr4a3/Plxna1/Bmpr1a/Myc/Pdgfa/Pdgfb/Plau/P2ry2/Ptk2/Trib1/Ptger4/Ccl5/Mdm2/Hdac4/Apex1/Aif1/Bcl2/Itgb3/Adipoq	26
GO:0001936	regulation of endothelial cell proliferation	34/2628	127/23239	1.13404e-06	1.82293e-05	1.12896e-05	Sparc/Ccl12/Htr2b/Ptprm/Arg1/Cav1/Il10/Gja1/Dll4/F3/Aldh1a2/Kdr/Nr2f2/Igf1/Egfl7/Thbs1/Ccl2/Vegfb/Ccl24/Ppp1r16b/Pdgfb/Nr4a1/Rgcc/Fgfr1/Akt1/Apoe/Jun/Plcg1/Pparg/Tnf/Sp1/Itga4/Bmpr2/Itgb3	34
GO:0060070	canonical Wnt signaling pathway	58/2628	272/23239	1.32985e-06	2.09599e-05	1.29807e-05	Dab2/Folr1/Cav1/Wnt11/Sostdc1/Dkk3/Kank1/Dact3/Sox9/Dact1/Sox4/Ctnnd2/Ankrd6/Egr1/Prickle1/Dapk3/Znrf3/Reck/Cdh1/Sdc1/Bambi/Tmem88/Gpc3/Otulin/Myc/Tmem64/Lrp4/Csnk1g2/Fzd5/Gata3/Apoe/Tcf7l2/Siah2/Tcf7/Lef1/Rnf220/Csnk1g3/Gsk3b/Csnk1e/Tle1/Fzd7/Tle4/Ddit3/Axin1/Tnks2/Cdk14/Trpm4/Foxo1/Gnaq/Dvl3/Ptpro/Xiap/Rspo1/Pfdn5/Ctnnd1/Thra/Yap1/Draxin	58
GO:0050880	regulation of blood vessel size	41/2628	168/23239	1.35379e-06	2.12814e-05	1.31798e-05	Htr7/Cx3cl1/Htr2b/Ptprm/Cav1/Ednra/Ptgs2/Gja1/Atp1a2/Kdr/Kcnma1/Wdr35/Hrh1/Adcy6/Mmp2/Per2/Mgll/Gclc/Dusp5/Pdgfb/Ptafr/P2ry2/Ednrb/Smad6/Ptgs1/Cd38/Akt1/Apoe/Ptk2/Hrh2/Hif1a/Trpm4/Snta1/P2ry1/Add3/Itga1/Acta2/Bmpr2/Gpx1/Slc6a4/Alox12	41
GO:0045766	positive regulation of angiogenesis	43/2628	180/23239	1.39651e-06	2.17255e-05	1.34548e-05	Il1a/Cx3cl1/Sphk1/Ptgs2/Il10/F3/Kdr/Serpine1/Thbs1/Angpt2/Fgf1/C3ar1/Camp/Cd34/Chil1/Il1b/Vegfb/Ccl24/Ppp1r16b/Plk2/C5ar1/Notch4/Tlr3/Ets1/Gab1/Cma1/Cxcr4/Hif1a/Jup/Plcg1/Ccl5/Prkcb/Map3k3/Btg1/Sp1/S100a1/Cybb/C3/Rras/Itgb3/Rhoj/Epha1/Hmga2	43
GO:0043542	endothelial cell migration	45/2628	194/23239	1.90129e-06	2.83307e-05	1.75454e-05	Sparc/Epha2/Ptprm/Ptgs2/Dll4/Amotl1/Stard13/Kdr/Bcar1/Nr2f2/Igf1/Thbs1/Angpt2/Fgf1/Adam8/Plekhg5/Plk2/Serpinf1/Pdgfb/Nr4a1/Rgcc/Fgfr1/Lgmn/Gata3/Akt1/Apoe/Spred1/Ets1/Paxip1/Ptk2/Hif1a/Jup/Dpp4/Plcg1/Pparg/Map3k3/Lgals8/Rock2/Pecam1/Sp1/Bmpr2/Gpx1/Itgb3/Rhoj/Alox12	45
GO:0001935	endothelial cell proliferation	36/2628	141/23239	1.89456e-06	2.83307e-05	1.75454e-05	Sparc/Epha2/Ccl12/Htr2b/Ptprm/Arg1/Cav1/Il10/Gja1/Dll4/F3/Aldh1a2/Kdr/Nr2f2/Igf1/Egfl7/Thbs1/Cd34/Ccl2/Vegfb/Ccl24/Ppp1r16b/Pdgfb/Nr4a1/Rgcc/Fgfr1/Akt1/Apoe/Jun/Plcg1/Pparg/Tnf/Sp1/Itga4/Bmpr2/Itgb3	36
GO:0043062	extracellular structure organization	60/2628	292/23239	3.1328e-06	4.39543e-05	2.72213e-05	Cyr61/Pmp22/Pdpn/Npnt/Phldb2/Aebp1/Mpo/Ctgf/Sox9/Col14a1/Spint1/Fbln1/Mmp11/Col18a1/Fscn1/Gfap/Sdc4/Apbb2/Flrt2/Tgfb2/Cd34/Plod2/Myo1e/P3h4/Col8a2/Olfml2b/Col27a1/Reck/Col11a2/Sdc1/Abca1/Aplp1/Lamb2/Rgcc/Spint2/Col4a2/Col4a1/Apoe/Efemp2/Loxl3/Ets1/Cd36/Abcg1/Cma1/Adamts14/Sh3pxd2b/Ptk2/Creb3l1/Dpp4/Ddr1/B4galt1/Adamtsl4/Ero1l/Dgat1/Tnf/Abca7/Fn1/Itgb3/Fech/Csgalnact1	60
GO:0031099	regeneration	34/2628	133/23239	3.50608e-06	4.8289e-05	2.99058e-05	Nrep/Mymk/Folr1/Gja1/Gfap/Serpine1/Cdk1/Igf1/Cebpb/Ccnd1/Lif/Rtn4rl1/Ifrd1/Mmp2/Plau/Lamb2/Mag/Jak2/Aurka/Jun/Klk8/Matn2/Capn3/Selenon/Ptprs/Ndel1/Ezh2/Fzd7/Mapk8ip3/Bcl2/Med1/Gpx1/Hopx/Yap1	34
GO:0048008	platelet-derived growth factor receptor signaling pathway	20/2628	60/23239	5.1075e-06	6.69662e-05	4.14728e-05	F3/Bcar1/Nr4a3/Myo1e/Apod/Csrnp1/Pdgfa/Pdgfb/Jak2/Tiparp/F7/Fer/Gab1/Hip1r/Zfand5/Ptgir/Itgb3/Txnip/Adipoq/Snca	20
GO:0090287	regulation of cellular response to growth factor stimulus	55/2628	265/23239	5.79928e-06	7.4253e-05	4.59855e-05	Dab2/Cyr61/Pmepa1/Cd109/Nrep/Msx1/Folr1/Npnt/Cav1/Htra3/Rasl11b/Sostdc1/Kdr/Eid2/Cd63/Thbs1/Fgf1/Spry2/Cdkn2b/Nbl1/Got1/Vegfb/Spry1/Skil/Bambi/Epn2/Tgfb3/Tmem204/Gpc3/Htra1/Chst11/Pdgfb/Lemd2/Fgfr1/Smad6/Nedd4/Smurf1/Gata3/Smad7/Fam20c/Tcf7l2/Ldlrad4/Creb3l1/Gpc1/Hif1a/Hspa5/Twsg1/Hes1/Prkcb/Axin1/Zeb1/Cited2/Spg20/Bmpr2/Ube2o	55
GO:1901888	regulation of cell junction assembly	24/2628	81/23239	6.30072e-06	8.01606e-05	4.96442e-05	Enpp2/Cldn1/Phldb2/Cav1/Gja1/Mmp14/Snai1/Kdr/Sdc4/Nphp1/Dapk3/Apod/Prkaca/Rac1/Fzd5/Ldb1/Ptk2/Dusp3/Rcc2/Slk/Rock2/Rapgef2/Tnf/Dusp22	24
GO:0007044	cell-substrate junction assembly	24/2628	83/23239	1.00075e-05	0.000119711	7.41379e-05	Enpp2/Phldb2/Ptprk/Mmp14/Kdr/Actn2/Sdc4/Dapk3/Tns1/Apod/Rac1/Dst/Cttn/Ldb1/Ptk2/Whamm/Dusp3/Rcc2/Slk/Bcl2/Dusp22/Tesk2/Fn1/Itgb3	24
GO:0010594	regulation of endothelial cell migration	36/2628	153/23239	1.39174e-05	0.000158504	9.81627e-05	Sparc/Epha2/Ptprm/Ptgs2/Dll4/Amotl1/Stard13/Kdr/Bcar1/Nr2f2/Igf1/Thbs1/Angpt2/Fgf1/Plk2/Serpinf1/Pdgfb/Rgcc/Fgfr1/Lgmn/Gata3/Akt1/Apoe/Spred1/Ets1/Hif1a/Jup/Plcg1/Pparg/Map3k3/Rock2/Sp1/Bmpr2/Itgb3/Rhoj/Alox12	36
GO:0043535	regulation of blood vessel endothelial cell migration	25/2628	90/23239	1.42813e-05	0.000161809	0.00010021	Epha2/Ptgs2/Dll4/Amotl1/Stard13/Kdr/Igf1/Thbs1/Angpt2/Plk2/Pdgfb/Rgcc/Fgfr1/Akt1/Apoe/Spred1/Ets1/Hif1a/Jup/Plcg1/Pparg/Map3k3/Sp1/Rhoj/Alox12	25
GO:0003018	vascular process in circulatory system	42/2628	192/23239	1.90928e-05	0.000208838	0.000129335	Htr7/Cx3cl1/Htr2b/Ptprm/Cav1/Ednra/Ptgs2/Gja1/Atp1a2/Kdr/Kcnma1/Wdr35/Hrh1/Adcy6/Ccl4/Mmp2/Per2/Mgll/Gclc/Dusp5/Pdgfb/Ptafr/P2ry2/Ednrb/Smad6/Ptgs1/Cd38/Akt1/Apoe/Ptk2/Hrh2/Hif1a/Trpm4/Snta1/P2ry1/Add3/Itga1/Acta2/Bmpr2/Gpx1/Slc6a4/Alox12	42
GO:0007229	integrin-mediated signaling pathway	24/2628	86/23239	1.93306e-05	0.000210291	0.000130235	Timp1/Dab2/Itga9/Ctgf/Cdh17/Cd63/Itgad/Bcar1/Itgb5/Itgax/Itga6/Loxl3/Ptk2/Lat/Gab2/Vav3/Rcc2/Plek/Itga4/Itga1/Cd177/Itgb3/Itga2b/Mpig6b	24
GO:0072577	endothelial cell apoptotic process	18/2628	55/23239	1.99492e-05	0.000215847	0.000133676	Gas6/Ecscr/Ccl12/Il10/Kdr/Col18a1/Serpine1/Thbs1/Tnfaip3/Angptl4/Rgcc/Gata3/Fasl/Plcg1/Tnf/Itga4/Hipk1/Bmpr2	18
GO:0014911	positive regulation of smooth muscle cell migration	19/2628	60/23239	2.01057e-05	0.000217105	0.000134455	Adamts1/Lpar1/F3/Igf1/Egr1/Sema6d/Nr4a3/Myc/Pdgfb/Plau/P2ry2/Ptk2/Ptger4/Ccl5/Mdm2/Hdac4/Aif1/Bcl2/Itgb3	19
GO:0017015	regulation of transforming growth factor beta receptor signaling pathway	26/2628	101/23239	4.15591e-05	0.000410465	0.000254204	Dab2/Pmepa1/Cd109/Nrep/Folr1/Npnt/Cav1/Htra3/Rasl11b/Eid2/Thbs1/Cdkn2b/Got1/Skil/Bambi/Tgfb3/Htra1/Chst11/Smad6/Smurf1/Smad7/Ldlrad4/Hspa5/Axin1/Zeb1/Cited2	26
GO:0031670	cellular response to nutrient	14/2628	39/23239	5.20169e-05	0.000494243	0.000306089	Gas6/Folr1/Folr2/Cdkn2b/P2ry12/Vdr/Fyn/Pim1/Pdxp/Castor1/Trpm4/Med1/Cib2/Usf2	14
GO:0032673	regulation of interleukin-4 production	12/2628	30/23239	5.19393e-05	0.000494243	0.000306089	Prg2/Cd83/Cebpb/Tnfsf4/Havcr2/Gata3/Cd28/Lef1/Prkcq/Icosl/Rara/Irf4	12
GO:0043534	blood vessel endothelial cell migration	28/2628	114/23239	5.36113e-05	0.000507785	0.000314476	Epha2/Ptgs2/Dll4/Amotl1/Stard13/Kdr/Igf1/Thbs1/Angpt2/Adam8/Plk2/Pdgfb/Nr4a1/Rgcc/Fgfr1/Akt1/Apoe/Spred1/Ets1/Hif1a/Jup/Plcg1/Pparg/Map3k3/Sp1/Gpx1/Rhoj/Alox12	28
GO:0002040	sprouting angiogenesis	28/2628	114/23239	5.36113e-05	0.000507785	0.000314476	Epha2/Ptgs2/Parva/Il10/Dll4/Stard13/Kdr/Thbs1/E2f7/Fgf1/Reck/Vegfb/Ppp1r16b/Epn2/Plk2/Otulin/Nr4a1/Akt1/Spred1/Lef1/Creb3l1/Map3k3/Jmjd6/S100a1/Rnf213/E2f2/Klf2/Rhoj	28
GO:1903844	regulation of cellular response to transforming growth factor beta stimulus	26/2628	103/23239	5.95834e-05	0.000554726	0.000343547	Dab2/Pmepa1/Cd109/Nrep/Folr1/Npnt/Cav1/Htra3/Rasl11b/Eid2/Thbs1/Cdkn2b/Got1/Skil/Bambi/Tgfb3/Htra1/Chst11/Smad6/Smurf1/Smad7/Ldlrad4/Hspa5/Axin1/Zeb1/Cited2	26
GO:0034333	adherens junction assembly	22/2628	81/23239	6.64135e-05	0.000607946	0.000376506	Enpp2/Phldb2/Ptprk/Mmp14/Kdr/Actn2/Sdc4/Dapk3/Apod/Rac1/Cttn/Smad7/Ldb1/Ptk2/Whamm/Dusp3/Rcc2/Slk/Bcl2/Dusp22/Hipk1/Tesk2	22
GO:0030198	extracellular matrix organization	49/2628	248/23239	6.8721e-05	0.000627158	0.000388404	Cyr61/Pmp22/Pdpn/Npnt/Phldb2/Aebp1/Ctgf/Sox9/Col14a1/Spint1/Fbln1/Mmp11/Col18a1/Fscn1/Gfap/Apbb2/Flrt2/Tgfb2/Plod2/Myo1e/P3h4/Col8a2/Olfml2b/Col27a1/Reck/Col11a2/Aplp1/Lamb2/Rgcc/Spint2/Col4a2/Col4a1/Efemp2/Loxl3/Ets1/Cma1/Adamts14/Sh3pxd2b/Ptk2/Creb3l1/Dpp4/Ddr1/B4galt1/Adamtsl4/Ero1l/Tnf/Fn1/Itgb3/Csgalnact1	49
GO:0045446	endothelial cell differentiation	26/2628	104/23239	7.09986e-05	0.00064696	0.000400668	Tmem100/Pdpn/Cldn1/Kdr/Col18a1/Nr2f2/Tjp1/Il1b/Jag1/Ppp1r16b/Notch4/Kdm6b/Clic4/Cxcr4/F11r/Ptprs/Heg1/Zeb1/Rock2/Rapgef2/Btg1/Tnf/Pecam1/Id1/Bmpr2/Gpx1	26
GO:0034105	positive regulation of tissue remodeling	14/2628	40/23239	7.17406e-05	0.000652731	0.000404242	Spp1/Dcstamp/Adam8/Vdr/Ltbp3/Tfrc/Tmem64/Tnfrsf11a/Ptger4/B4galt1/Tmbim1/Rock2/Itgb3/Car2	14
GO:0035567	non-canonical Wnt signaling pathway	17/2628	55/23239	7.64374e-05	0.000682031	0.000422387	Dab2/Wnt11/Celsr1/Dact1/Ankrd6/Ryk/Znrf3/Gpc3/Rac1/Fzd5/Csnk1e/Fzd7/Dvl3/Rnf213/Tiam1/Rspo1/Celsr3	17
GO:0010595	positive regulation of endothelial cell migration	24/2628	95/23239	0.000111162	0.000933605	0.000578189	Sparc/Ptgs2/Amotl1/Kdr/Bcar1/Igf1/Thbs1/Fgf1/Plk2/Pdgfb/Fgfr1/Lgmn/Gata3/Akt1/Ets1/Hif1a/Plcg1/Map3k3/Rock2/Sp1/Bmpr2/Itgb3/Rhoj/Alox12	24
GO:0007173	epidermal growth factor receptor signaling pathway	24/2628	95/23239	0.000111162	0.000933605	0.000578189	Tgfa/Gprc5a/Sox9/Neurl1a/Bcar1/Areg/Hbegf/Nrg2/Hap1/Errfi1/Akt1/Rhbdf1/Fer/Gab1/Hip1r/Ptk2/Fasl/Plcg1/Dusp3/Plaur/Mvb12b/Nup62/Itga1/Pde6h	24
GO:0007045	cell-substrate adherens junction assembly	20/2628	73/23239	0.000122997	0.00102157	0.000632667	Enpp2/Phldb2/Ptprk/Mmp14/Kdr/Actn2/Sdc4/Dapk3/Apod/Rac1/Cttn/Ldb1/Ptk2/Whamm/Dusp3/Rcc2/Slk/Bcl2/Dusp22/Tesk2	20
GO:0032633	interleukin-4 production	13/2628	37/23239	0.000123696	0.00102454	0.000634508	Prg2/Cd83/Cebpb/Tnfsf4/Havcr2/Gata3/Itk/Cd28/Lef1/Prkcq/Icosl/Rara/Irf4	13
GO:2000351	regulation of endothelial cell apoptotic process	16/2628	52/23239	0.000130934	0.00106594	0.000660145	Gas6/Ecscr/Ccl12/Il10/Kdr/Col18a1/Serpine1/Thbs1/Tnfaip3/Angptl4/Rgcc/Gata3/Fasl/Plcg1/Tnf/Itga4	16
GO:1904705	regulation of vascular smooth muscle cell proliferation	16/2628	52/23239	0.000130934	0.00106594	0.000660145	Adamts1/Il10/Igf1/Nr4a3/Bmpr1a/Tgfb3/Mmp2/Cdkn1a/Pdgfb/Jak2/Jun/Mef2d/Pparg/Mdm2/Tnf/Adipoq	16
GO:1990874	vascular smooth muscle cell proliferation	16/2628	52/23239	0.000130934	0.00106594	0.000660145	Adamts1/Il10/Igf1/Nr4a3/Bmpr1a/Tgfb3/Mmp2/Cdkn1a/Pdgfb/Jak2/Jun/Mef2d/Pparg/Mdm2/Tnf/Adipoq	16
GO:0032753	positive regulation of interleukin-4 production	10/2628	24/23239	0.000146952	0.00116999	0.000724582	Prg2/Cebpb/Tnfsf4/Havcr2/Gata3/Cd28/Prkcq/Icosl/Rara/Irf4	10
GO:0001570	vasculogenesis	23/2628	92/23239	0.000181211	0.00137744	0.000853057	Epha2/Tmem100/Cav1/Ackr3/Asb4/Kdr/Egfl7/Fgf1/Cd34/Myo1e/Fgfr1/Foxm1/Junb/Tiparp/Spred1/Paxip1/Ptk2/Zfp36l1/Heg1/Cited2/Rapgef2/Yap1/Tie1	23
GO:0038127	ERBB signaling pathway	25/2628	105/23239	0.000222415	0.00163458	0.00101231	Tgfa/Gprc5a/Sox9/Neurl1a/Bcar1/Areg/Hbegf/Nrg2/Hap1/Errfi1/Lgmn/Akt1/Rhbdf1/Fer/Gab1/Hip1r/Ptk2/Fasl/Plcg1/Dusp3/Plaur/Mvb12b/Nup62/Itga1/Pde6h	25
GO:0045216	cell-cell junction organization	31/2628	142/23239	0.00023095	0.00168308	0.00104234	Epha2/Pmp22/Cldn1/Cav1/Wnt11/Gja1/Snai1/Cdh17/Fscn1/Epb41l3/Ctnnd2/Tgfb2/Cxadr/Nphp1/Cdh1/Tgfb3/Ect2/Whrn/Rhoc/Prkaca/Rac1/Grhl1/Fzd5/Jup/Heg1/Rock2/Tnf/Cd9/Ptpro/Ctnnd1/Cd177	31
GO:2000810	regulation of bicellular tight junction assembly	8/2628	17/23239	0.000250323	0.00180239	0.00111623	Cldn1/Gja1/Snai1/Nphp1/Prkaca/Fzd5/Rock2/Tnf	8
GO:0034103	regulation of tissue remodeling	21/2628	83/23239	0.000284598	0.00200588	0.00124226	Spp1/Gpnmb/Gja1/Dcstamp/Adam8/Vdr/Ltbp3/Tfrc/Il6/Tmem64/S1pr1/Cd38/Tnfrsf11a/Ptger4/B4galt1/Inpp4b/Suco/Tmbim1/Rock2/Itgb3/Car2	21
GO:0001938	positive regulation of endothelial cell proliferation	22/2628	89/23239	0.000294675	0.00205281	0.00127132	Htr2b/Arg1/Cav1/Il10/F3/Kdr/Igf1/Egfl7/Ccl2/Vegfb/Ccl24/Ppp1r16b/Pdgfb/Nr4a1/Fgfr1/Akt1/Jun/Plcg1/Sp1/Itga4/Bmpr2/Itgb3	22
GO:0043536	positive regulation of blood vessel endothelial cell migration	16/2628	56/23239	0.000339213	0.00228853	0.00141731	Ptgs2/Amotl1/Kdr/Igf1/Thbs1/Plk2/Pdgfb/Fgfr1/Akt1/Ets1/Hif1a/Plcg1/Map3k3/Sp1/Rhoj/Alox12	16
GO:0001974	blood vessel remodeling	15/2628	51/23239	0.000365207	0.00243134	0.00150575	Gja1/Dll4/Igf1/Tgm2/Angpt2/Tgfb2/Lif/Jag1/Chd7/Axl/Mdm2/Tmbim1/Itga4/Bmpr2/Bak1	15
GO:0007043	cell-cell junction assembly	24/2628	104/23239	0.000481624	0.00299394	0.00185417	Epha2/Pmp22/Cldn1/Cav1/Wnt11/Gja1/Snai1/Cdh17/Fscn1/Epb41l3/Ctnnd2/Nphp1/Cdh1/Ect2/Rhoc/Prkaca/Fzd5/Jup/Heg1/Rock2/Tnf/Cd9/Ptpro/Ctnnd1	24
GO:0060674	placenta blood vessel development	12/2628	37/23239	0.000522625	0.00318262	0.00197102	Cyr61/Spint1/Nr2f2/Fosl1/Junb/Fzd5/Rbm15/Akt1/Plcd1/Hes1/Socs3/Nfe2	12
GO:0010573	vascular endothelial growth factor production	11/2628	33/23239	0.000683157	0.0039598	0.00245234	Il1a/Ptgs2/C3ar1/Ccl2/Il1b/Il6/C5ar1/Ndrg2/Adgrg1/Hif1a/C3	11
GO:1904707	positive regulation of vascular smooth muscle cell proliferation	11/2628	34/23239	0.000907673	0.0049868	0.00308837	Adamts1/Igf1/Nr4a3/Bmpr1a/Mmp2/Pdgfb/Jak2/Jun/Mef2d/Mdm2/Tnf	11
GO:2000050	regulation of non-canonical Wnt signaling pathway	9/2628	25/23239	0.00112002	0.00595724	0.00368937	Dab2/Dact1/Ankrd6/Znrf3/Gpc3/Csnk1e/Rnf213/Tiam1/Rspo1	9
GO:1903670	regulation of sprouting angiogenesis	17/2628	68/23239	0.00120539	0.00633276	0.00392193	Ptgs2/Il10/Dll4/Stard13/Kdr/Thbs1/Fgf1/Ppp1r16b/Epn2/Plk2/Spred1/Creb3l1/Map3k3/S100a1/E2f2/Klf2/Rhoj	17
GO:0120193	tight junction organization	13/2628	46/23239	0.00133467	0.00690921	0.00427893	Epha2/Cldn1/Wnt11/Gja1/Snai1/Nphp1/Cdh1/Tgfb3/Ect2/Prkaca/Fzd5/Rock2/Tnf	13
GO:0035023	regulation of Rho protein signal transduction	27/2628	131/23239	0.00141889	0.00728865	0.00451392	Arhgef25/Lpar1/Kank1/Arhgef40/Lpar4/Plekhg5/P2ry10/Net1/Stmn1/Ect2/Abca1/Prag1/Arhgef39/Vav2/Apoe/Adgrg1/Ophn1/Arhgef10/Vav3/Dnmbp/Arhgef37/Bcl6/Tiam1/Gpr18/P2ry10b/Arhgef18/Trio	27
GO:0010712	regulation of collagen metabolic process	14/2628	52/23239	0.00148311	0.0075861	0.00469814	Ctgf/Cyp2j6/Serpine1/Ccl2/Got1/Tgfb3/Il6/Errfi1/Pdgfb/Rgcc/Creb3l1/Pparg/Suco/Cbx8	14
GO:0030574	collagen catabolic process	9/2628	26/23239	0.00154266	0.00782404	0.0048455	Ctsk/Mrc2/Mmp14/Mmp11/Mmp7/Mmp2/Ctsb/Mmp19/Mmp8	9
GO:0060071	Wnt signaling pathway, planar cell polarity pathway	11/2628	36/23239	0.00154038	0.00782404	0.0048455	Dab2/Wnt11/Celsr1/Dact1/Ankrd6/Ryk/Znrf3/Gpc3/Rac1/Dvl3/Celsr3	11
GO:0010574	regulation of vascular endothelial growth factor production	10/2628	31/23239	0.00158164	0.00796122	0.00493045	Il1a/Ptgs2/C3ar1/Ccl2/Il1b/Il6/C5ar1/Ndrg2/Hif1a/C3	10
GO:0001885	endothelial cell development	16/2628	64/23239	0.00165941	0.00827435	0.00512438	Cldn1/Col18a1/Tjp1/Il1b/Ppp1r16b/Notch4/Clic4/F11r/Ptprs/Heg1/Rock2/Rapgef2/Tnf/Pecam1/Id1/Gpx1	16
GO:0071774	response to fibroblast growth factor	20/2628	88/23239	0.00167186	0.00832462	0.00515551	Flrt3/Shcbp1/Kl/Dll4/Ctgf/Flrt2/Thbs1/Fgf1/Spry2/Spry1/Pdgfb/Nr4a1/Fgfr1/Gata3/Fam20c/Tcf7l2/Zfp36l1/Creb3l1/Gpc1/Grb2	20
GO:0070830	bicellular tight junction assembly	12/2628	42/23239	0.00182466	0.00891545	0.00552141	Epha2/Cldn1/Wnt11/Gja1/Snai1/Nphp1/Cdh1/Ect2/Prkaca/Fzd5/Rock2/Tnf	12
GO:0034332	adherens junction organization	25/2628	121/23239	0.00201432	0.00966135	0.00598335	Enpp2/Phldb2/Ptprk/Mmp14/Cdh17/Kdr/Actn2/Sdc4/Dapk3/Apod/Cdh1/Arf6/Rac1/Cttn/Smad7/Ldb1/Ptk2/Whamm/Dusp3/Rcc2/Slk/Bcl2/Dusp22/Hipk1/Tesk2	25

## Sheet: CC
ID	Description	GeneRatio	BgRatio	pvalue	p.adjust	qvalue	geneID	Count
GO:0005911	cell-cell junction	97/2670	459/23416	1.10973e-09	5.16396e-08	4.02619e-08	Flrt3/Cadm1/Epha2/Pmp22/Synpo/Epcam/Cldn1/Ptprm/Ptprk/Jam2/Dbn1/Gja1/Mpdz/Magi1/Iqgap3/Jam3/Amotl1/Atp1a2/Cdh17/Fscn1/Sv2a/Kit/Aqp3/Themis/Flrt2/Epb41l3/Ctnnd2/Tjp1/Cxadr/Nphp1/Ccnd1/Scn1b/Cgnl1/Sapcd2/Myo1e/Fxyd1/Plekhg5/Abcb4/Cdh1/Ect2/Ildr1/Nectin2/Traf4/Cdca3/Ssx2ip/Pdxp/Fgf13/Itga6/Fzd5/Dst/Abcb1a/Akt1/Itk/Tmem65/Skap1/Clic4/Smad7/Dlg3/Pvr/Lck/Ptk2/Cxcr4/F11r/Jup/Dpp4/Atp2a2/Heg1/Plcg1/Frmd4…	97
GO:0062023	collagen-containing extracellular matrix	73/2670	330/23416	1.74473e-08	5.53554e-07	4.3159e-07	Timp1/Sparc/Adamts1/P3h2/Cspg4/Pmp22/Thbs2/Prg2/Npnt/Bmp1/Lad1/Ptn/Plxdc2/Col6a3/Sparcl1/Sod3/Lama4/F3/Ntn4/Col14a1/Fbln1/Adamtsl5/Col18a1/Mfap2/Serpine1/Igf1/Egfl7/Thbs1/Tgm2/Igfbp7/Serpine2/Tgfb2/Elane/Sema6d/Timp3/Col8a2/Col27a1/Col11a2/Tgfb3/Ctsd/Gpc3/Timp2/Serpinf1/Htra1/Lamb2/Col4a2/Itga6/Nav2/Ctsl/Col4a1/Emid1/Matn2/Efemp2/Spon1/Itih5/Lamb3/Gpc1/Serpinb9/Entpd1/Adamtsl4/Ctsb/Il16/Vcan/F13a…	73
GO:0031012	extracellular matrix	92/2670	474/23416	2.04486e-07	5.48965e-06	4.28012e-06	Timp1/Sparc/Cyr61/Adamts1/P3h2/Cspg4/Pmp22/Thbs2/Prg2/Npnt/Bmp1/Lad1/Ptn/Plxdc2/Wnt11/Col6a3/Sparcl1/Sod3/Mmp14/Lama4/F3/Ntn4/Ctgf/Col14a1/Fbln1/Mmp23/Adamtsl5/Mmp11/Col18a1/Mfap2/Mmp7/Serpine1/Igf1/Egfl7/Thbs1/Tgm2/Fgf1/Igfbp7/Serpine2/Mmp12/Tgfb2/Elane/Sema6d/Timp3/Col8a2/Il1rl1/Olfml2b/Col27a1/Col11a2/Tgfb3/Mmp2/Ctsd/Gpc3/Ltbp3/Timp2/Serpinf1/Mmp25/Htra1/Lamb2/Col4a2/Itga6/Nav2/Ctsl/Col4a1/Emi…	92
GO:0005604	basement membrane	30/2670	105/23416	1.2926e-06	3.11115e-05	2.42568e-05	Timp1/Sparc/Adamts1/P3h2/Pmp22/Thbs2/Npnt/Lad1/Ptn/Lama4/Ntn4/Fbln1/Col18a1/Tgfb2/Timp3/Col8a2/Timp2/Serpinf1/Lamb2/Col4a2/Itga6/Col4a1/Matn2/Lamb3/Entpd1/Cd151/Megf9/Rpsa/Fn1/Ache	30
GO:0005912	adherens junction	58/2670	280/23416	4.51418e-06	9.54817e-05	7.44444e-05	Flrt3/Fblim1/Epha2/Ptprm/Phldb2/Cav1/Parva/Gja1/Magi1/Synpo2/Cdh17/Actn2/Bcar1/Sdc4/Flrt2/Ctnnd2/Tjp1/Cxadr/Itgb5/Asap3/Sorbs3/Myo1e/Tns1/Jag1/Abcb4/Cdh1/Prag1/Nectin2/Cdca3/Ssx2ip/Jak2/Itga6/Dst/Cttn/Smad7/Ppfia1/Pvr/Ptk2/Tes/Parvg/Jup/Atp2a2/Frmd4b/Pdlim7/Usp33/Fam129b/Neurl2/Cib2/Tgm1/Itga1/Scrib/Bmpr2/Ctnnd1/Parvb/Itgb3/Ndrg1/Esam/Itga2b	58
GO:0070160	tight junction	30/2670	127/23416	7.52966e-05	0.000922053	0.000718898	Epha2/Pmp22/Synpo/Epcam/Cldn1/Jam2/Mpdz/Magi1/Jam3/Amotl1/Tjp1/Cxadr/Nphp1/Ccnd1/Cgnl1/Sapcd2/Ect2/Ildr1/Traf4/Fzd5/Dlg3/F11r/Frmd4b/Ubn1/Cyth1/Rapgef2/Sympk/Amotl2/Ctnnd1/Esam	30
GO:0005923	bicellular tight junction	28/2670	120/23416	0.000160928	0.00178298	0.00139014	Pmp22/Synpo/Epcam/Cldn1/Jam2/Mpdz/Magi1/Jam3/Amotl1/Tjp1/Cxadr/Nphp1/Ccnd1/Cgnl1/Sapcd2/Ect2/Traf4/Fzd5/Dlg3/F11r/Frmd4b/Ubn1/Cyth1/Rapgef2/Sympk/Amotl2/Ctnnd1/Esam	28
GO:0043296	apical junction complex	30/2670	140/23416	0.000464822	0.00405557	0.00316201	Pmp22/Synpo/Epcam/Cldn1/Jam2/Mpdz/Magi1/Jam3/Amotl1/Tjp1/Cxadr/Nphp1/Ccnd1/Cgnl1/Sapcd2/Cdh1/Ect2/Nectin2/Traf4/Fzd5/Dlg3/F11r/Frmd4b/Ubn1/Cyth1/Rapgef2/Sympk/Amotl2/Ctnnd1/Esam	30
GO:0005924	cell-substrate adherens junction	32/2670	153/23416	0.000481714	0.00415107	0.00323647	Flrt3/Fblim1/Epha2/Phldb2/Cav1/Parva/Synpo2/Actn2/Bcar1/Sdc4/Flrt2/Itgb5/Asap3/Sorbs3/Tns1/Abcb4/Prag1/Jak2/Dst/Cttn/Ppfia1/Ptk2/Tes/Parvg/Pdlim7/Usp33/Neurl2/Cib2/Itga1/Parvb/Itgb3/Itga2b	32
GO:0030055	cell-substrate junction	33/2670	160/23416	0.000515727	0.00438997	0.00342273	Flrt3/Fblim1/Epha2/Phldb2/Cav1/Parva/Synpo2/Actn2/Bcar1/Sdc4/Flrt2/Itgb5/Asap3/Sorbs3/Tns1/Abcb4/Prag1/Jak2/Itga6/Dst/Cttn/Ppfia1/Ptk2/Tes/Parvg/Pdlim7/Usp33/Neurl2/Cib2/Itga1/Parvb/Itgb3/Itga2b	33
GO:0008305	integrin complex	11/2670	33/23416	0.000733071	0.00588142	0.00458558	Pmp22/Npnt/Itga9/Itgad/Itgb5/Itgax/Itga6/Itga4/Itga1/Itgb3/Itga2b	11

## Sheet: MF
ID	Description	GeneRatio	BgRatio	pvalue	p.adjust	qvalue	geneID	Count
GO:0005178	integrin binding	37/2625	122/22744	1.91185e-08	2.90327e-06	2.36034e-06	Dab2/Cyr61/Vcam1/Cx3cl1/Gpnmb/Npnt/Mmp14/Ctgf/Jam3/Fbln1/Cdh17/Kdr/Gfap/Igf1/Thbs1/Fgf1/Cxadr/Itgb5/Adam8/Il1b/Cd81/Timp2/Tspan4/Lamb2/Itga6/Ptk2/Gsk3b/Adam9/Lgals8/Cd9/Icam2/Cib2/Cd151/Fn1/Cd177/Itgb3/Vwf	37
GO:0005125	cytokine activity	51/2625	214/22744	3.11935e-07	1.95802e-05	1.59186e-05	Ccl22/Il1a/Timp1/Spp1/Ccl8/Ccl7/Cx3cl1/Ccl12/Cxcl14/Il12b/Gdf15/Bmp1/Cxcl11/Il10/Osm/Cxcl3/Kitl/Cxcl16/Ccl17/Areg/Tgfb2/Tnfsf4/Ccl2/Lif/Il1b/Tnfsf9/Ccl24/Ccl4/Tgfb3/Inhba/Ccl3/Il1rn/Cmtm8/Il6/Cxcl2/Ifng/Tnfsf8/Clcf1/Cxcl9/Csf1/Fasl/Cxcl10/Ccl5/Tnf/Ccl25/Il16/Tnfsf13b/Ccl9/Ctf2/Il23a/Ppbp	51
GO:0005518	collagen binding	24/2625	69/22744	3.55701e-07	1.99005e-05	1.6179e-05	Sparc/Ctsk/Cspg4/Mrc2/Sparcl1/Pcolce/Aebp1/Itga9/Thbs1/Mmp12/Pdgfa/Pdgfb/Smad7/Adgrg1/Gpc1/Dpp4/Ddr1/Ctsb/Adam9/Itga1/Ache/Vwf/Gp6/Gp5	24
GO:0019838	growth factor binding	39/2625	147/22744	4.18239e-07	2.22294e-05	1.80723e-05	Cyr61/Cd109/Kl/Ptn/Htra3/Ctgf/A2m/Kdr/Il2ra/Thbs1/Igfbp2/Igfbp7/Il1r2/Bmpr1a/Hap1/Tgfb3/Ltbp3/Il1rn/Pdgfa/Htra1/Pdgfb/Pdxp/Fgfr1/Itga6/Igf2r/Dusp1/Col4a1/Cd36/Igfbp4/Gpc1/Twsg1/Insr/Rps19/Sec61b/Il3ra/Bmpr2/Rpl37/Acvr1b/Itgb3	39
GO:0019955	cytokine binding	35/2625	128/22744	7.43928e-07	3.16318e-05	2.57164e-05	Cd109/Pdpn/Il12b/Ackr3/Sostdc1/A2m/Il2ra/Kit/Cxcr6/Thbs1/Elane/Il1r2/Ccr7/Nbl1/Il1rl1/Tgfb3/Ccrl2/Ltbp3/Il1rn/Ccr5/Il12rb1/Il18r1/Il18bp/Cd36/Tnfrsf11a/Cd74/Cxcr4/Ccr1/Tnfrsf9/Twsg1/Il27ra/Itga4/Il3ra/Bmpr2/Itgb3	35
GO:0005126	cytokine receptor binding	67/2625	322/22744	1.10519e-06	4.35118e-05	3.53747e-05	Ccl22/Il1a/Ccl8/Ccl7/Cx3cl1/Ccl12/Cxcl14/Il12b/Gdf15/Cxcl11/Il10/Rasl11b/Osm/Cxcl3/Kitl/Cxcl16/Ccl17/Angpt2/Tgfb2/Tnfsf4/Ccl2/Lif/Il1b/Vegfb/Tnfsf9/Ccl24/Ccl4/Socs2/Tgfb3/Ccrl2/Inhba/Ccl3/Il1rn/Traf4/Il6/Cxcl2/Il12rb1/Ifng/Tnfsf8/Clcf1/Traf1/Cxcl9/Jak2/Smad6/Csf1/Cd300lf/Gata3/Smad7/Spred1/Bex3/Fasl/Cxcl10/Plcg1/Ccl5/Tlr5/Nsmaf/Tmbim1/Grb2/Tnf/Ccl25/Tnfsf13b/Cd2ap/Ccl9/Itgb3/Ctf2/Il23a/Ppbp	67
GO:0005520	insulin-like growth factor binding	11/2625	28/22744	0.000155709	0.00306517	0.00249196	Cyr61/Htra3/Ctgf/Igfbp2/Igfbp7/Htra1/Itga6/Igf2r/Igfbp4/Insr/Itgb3	11
GO:0070851	growth factor receptor binding	32/2625	144/22744	0.000190027	0.00360713	0.00293256	Il1a/Flrt3/Tgfa/Kl/Il10/Yes1/Flrt2/Areg/Angpt2/Fgf1/Il1b/Hbegf/Vegfb/Nrg2/Il1rn/Fyn/Il6/Pdgfa/Il12rb1/Pdgfb/Jak2/Cd300lf/Gata3/Vav2/Fer/Plscr1/Tlr5/Vav3/Atxn2/Grb2/Cd2ap/Itgb3	32
GO:0050840	extracellular matrix binding	16/2625	59/22744	0.000804649	0.0097198	0.00790212	Spp1/Sparc/Cyr61/Sparcl1/Itga9/Ntn4/Thbs1/Olfml2b/Itga6/Adgrg1/Gpc1/Adam9/Rpsa/Itgb3/Ache/Itga2b	16
